# Supplementary material for: Impact of International Shipping Emissions on Ozone and PM 2.5 : The Important Role of HONO and ClNO 2
Source: Copernicus journal article supplement (doi:10.5194/acp-2020-1185), 2021-02-04
Supplement: Supplementary file 1 [file acp-2020-1185-supplement.pdf]

*Supplement of*

**Impact of International Shipping Emissions on Ozone and PM<sub>2.5</sub>:  
The Important Role of HONO and ClNO<sub>2</sub>**

**Jianing Dai<sup>1</sup>, Tao Wang<sup>1</sup>**

Department of Civil and Environmental Engineering, The Hong Kong Polytechnic University,  
Hong Kong, 999077, China

*Correspondence to:* Tao Wang ([cetwang@polyu.edu.hk](mailto:cetwang@polyu.edu.hk))

Number of pages: 17

Number of tables: 4

Number of figures: 11

**Table S1.** Ranges of latitude and longitude in nine regions.

| Regions                  | Ranges of latitude | Ranges of longitude |
|--------------------------|--------------------|---------------------|
| South China Sea (SCS)    | 0—25°N             | 100°E—125°E         |
| East China Sea (ECS)     | 25°N—35°N          | 119°E—130°E         |
| Bohai Rim (BR)           | 35°N—41°N          | 118°E—127°E         |
| Bay of Bengal (BOB)      | 10°N—25°N          | 80°E—95°E           |
| The Sea of Japan (SOJ)   | 35°N—50°N          | 130°E—142°E         |
| West Pacific Ocean (WPO) | 0—35°N             | 125°E—142°E         |

**Table S2.** Statistics of meteorological variables and air pollutants.

|                                                      | OBS <sup>a</sup> | SIM <sup>a</sup> | MB <sup>b</sup> | NMB <sup>b</sup> (%) | NME <sup>b</sup> (%) | R <sup>b</sup> |
|------------------------------------------------------|------------------|------------------|-----------------|----------------------|----------------------|----------------|
| WS <sub>10</sub> <sup>c</sup> (m s <sup>-1</sup> )   | 4.5              | 5.3              | 0.8             | 1.0                  | 1.2                  | 0.90           |
| RH <sup>c</sup> (%)                                  | 80.2             | 82.0             | 2.0             | 2.2                  | 2.4                  | 0.94           |
| T <sub>2</sub> <sup>c</sup> (°C)                     | 28.4             | 29.0             | 0.6             | 0.8                  | 1.2                  | 0.88           |
| PM <sub>2.5</sub> <sup>d</sup> (μg m <sup>-3</sup> ) | 45.2             | 55.8             | 17.6            | 18.7                 | 20.0                 | 0.42           |
| NO <sub>2</sub> <sup>d</sup> (ppbv)                  | 13.8             | 10.5             | -3.3            | -8.5                 | 10.0                 | 0.61           |
| Ozone <sup>d</sup> (ppbv)                            | 83.3             | 77.8             | -5.5            | -8.7                 | 12.4                 | 0.77           |

<sup>a</sup> SIM is the simulated data, OBS is the observational data.

<sup>b</sup> Mean Bias (MB) =  $\frac{\sum_{i=1}^n (x_i - y_i)}{n}$ ; Normalized Mean Bias (NMB) =  $\sum_{i=1}^n \frac{Sim_i - Obs_i}{Obs_i}$ ; Normalized Mean Errors (NME) =  $\sum_{i=1}^n \frac{|Sim_i - Obs_i|}{Obs_i}$ ;  $R = \frac{\sum_{i=1}^n (x_i - \bar{x})(y_i - \bar{y})}{\sqrt{\sum_{i=1}^n (x_i - \bar{x})^2 \sum_{i=1}^n (y_i - \bar{y})^2}}$ ;  $n$  is the number of hour.

<sup>c</sup> Observational data was obtained from the National Climate Data Center (NCDC). WS<sub>10</sub>: wind speed at 10 m; T<sub>2</sub>: temperature at 2 m; RH: specific humidity at 2 m.

<sup>d</sup> Observational data was obtained from China's Ministry of Ecology and Environment (MEE).

**Table S3.** Statistics of model performance in different cases for hourly O<sub>3</sub> measurements at MEE station and monthly O<sub>3</sub> in three marine sites (Unit: ppbv).

| Regions           | CASE    | OBS  | SIM  | MB   |
|-------------------|---------|------|------|------|
| HT <sup>a</sup>   | Default | 22.4 | 19.6 | -2.8 |
|                   | HONO    |      | 20.3 | -2.1 |
|                   | Cl      |      | 19.9 | -2.5 |
|                   | BASE    |      | 20.9 | -1.5 |
| Ryori             | Default | 26.1 | 21.3 | -4.8 |
|                   | HONO    |      | 23.1 | -3.0 |
|                   | Cl      |      | 22.1 | -4.0 |
|                   | BASE    |      | 24.1 | -2.0 |
| Yona <sup>b</sup> | Default | 19.9 | 17.6 | -2.3 |
|                   | HONO    |      | 19.2 | -0.7 |
|                   | Cl      |      | 18.6 | -1.3 |
|                   | BASE    |      | 19.2 | -0.7 |

<sup>a</sup> North Central Plain (NCP), <sup>b</sup>Yangzi River Delta (YRD), <sup>c</sup> Pearl River Delta (PRD), <sup>d</sup> Hok Tsui (HT), <sup>e</sup> Yonagunijima (Yona).

**Table S4.** Comparison between simulated and observed HONO, N<sub>2</sub>O<sub>5</sub>, and ClNO<sub>2</sub> in coastal and marine sites.

| Species                       | Location               | Sites type                  | Observational period            | Observational average  | References               |
|-------------------------------|------------------------|-----------------------------|---------------------------------|------------------------|--------------------------|
| HONO                          | South of Vancouver     | Coastal site                | 25 July to 8 August 2008        | 0.5-1.5 ppbv           | Wojtal et al. (2011)     |
|                               | North Atlantic Ocean   | Marine site                 | 5 July and 8 July 2013          | 8.8-11.3 pptv          | Ye et al. (2016)         |
|                               | Mediterranean island   | Coastal remote site         | 7 July to 4 August 2014         | 35.0 pptv              | Meusel et al. (2016)     |
|                               | Eastern Bohai Sea      | Marine background site      | 5 October to 5 November 2016    | 0.2 ppbv               | Wen et al. (2019)        |
|                               | Eastern Atlantic Ocean | Marine background site      | 24 November and 3 December 2015 | 3.0-6.0 pptv           | Kasibhatla et al. (2018) |
|                               | East China Sea         | Shipboard-based measurement | July 2017                       | 0.6-1.1 ppbv           | Cui et al. (2019)        |
|                               | South China Sea        | Coastal background site     | 31 August to 8 October 2018     | 89.0 pptv <sup>a</sup> | Unpublished data         |
| N <sub>2</sub> O <sub>5</sub> | South China Sea        | Coastal background site     | 31 August to 8 October 2018     | 8.5 pptv <sup>a</sup>  | Unpublished data         |
| ClNO <sub>2</sub>             | South China Sea        | Coastal background site     | 31 August to 8 October 2018     | 89.0 pptv <sup>a</sup> | Unpublished data         |

<sup>a</sup> Observed data was filtered with one-day backward trajectory from ocean.

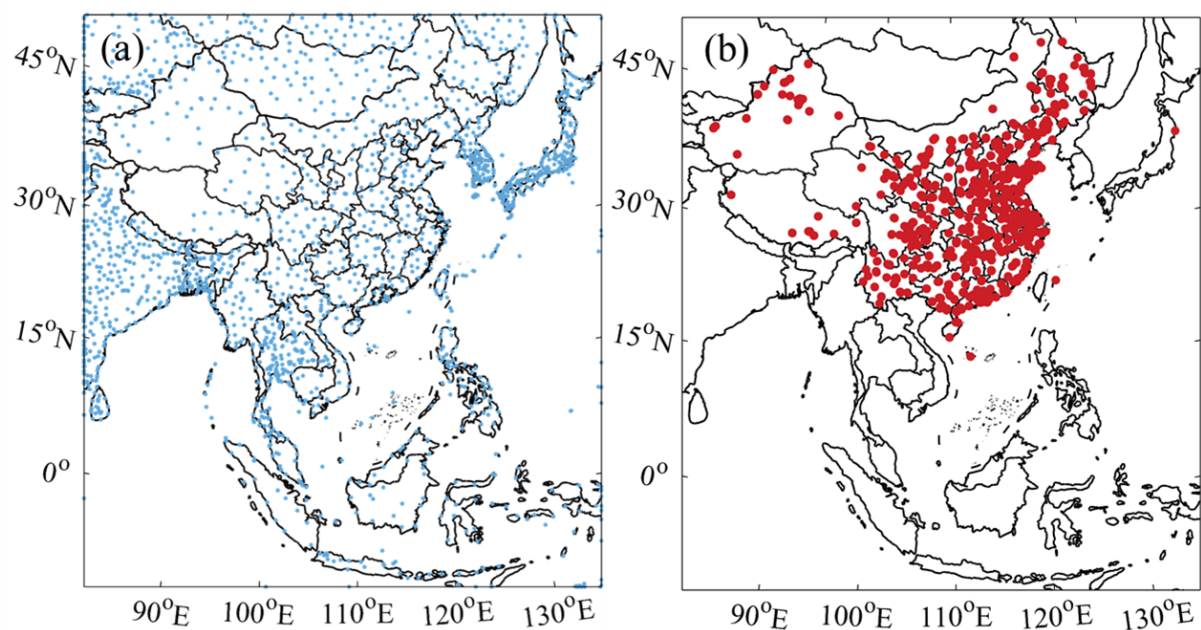

**Figure S1.** Measurement sites. (a) Blue dots denote the surface weather stations in NCDC in July 2018. (b) Red dots denote the available surface air-quality monitoring stations operated by MEE in July 2018.

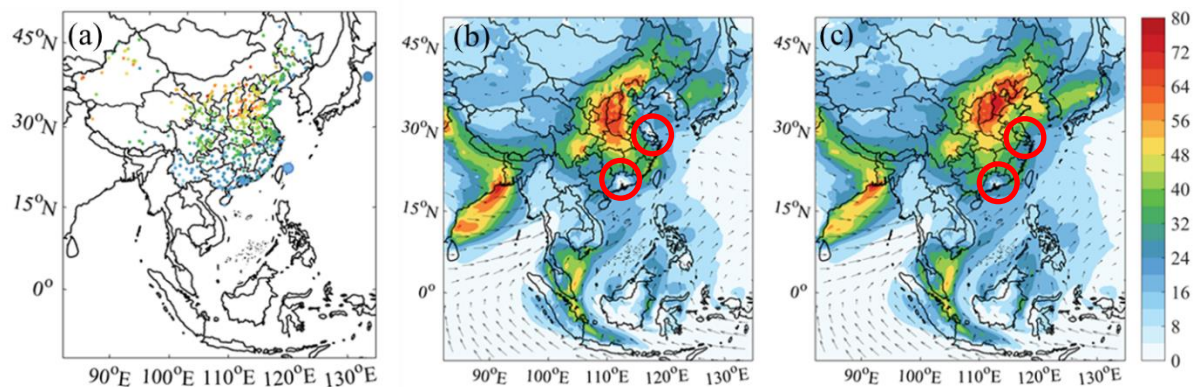

**Figure S2.** (a) Observations of O<sub>3</sub> at China MEE station and two marine sites in Japan and modeled O<sub>3</sub> mixing ratios with (b) default chemistry and (c) integrated HONO and chlorine chemistry (Unit: ppbv). The red circles in (b) and (c) highlight the O<sub>3</sub> simulation in coastal areas.

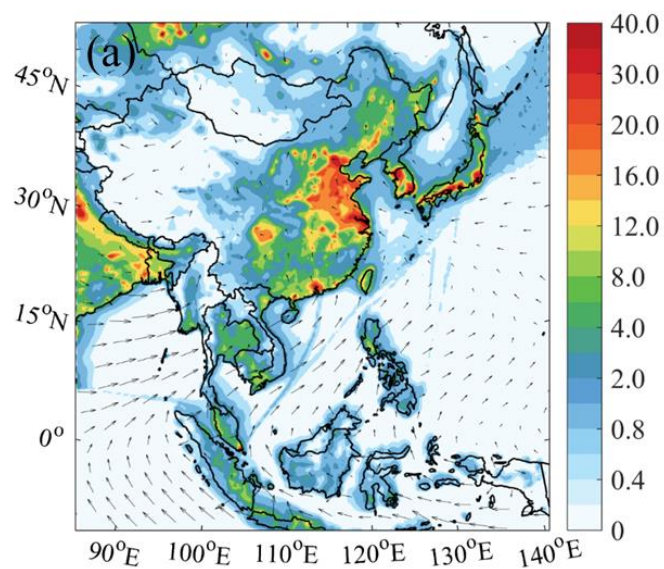

**Figure S3.** (a) Spatial distribution of averaged NO<sub>2</sub> (Unit: ppbv) at the surface. Arrows present the simulated wind vectors from the BASE case.



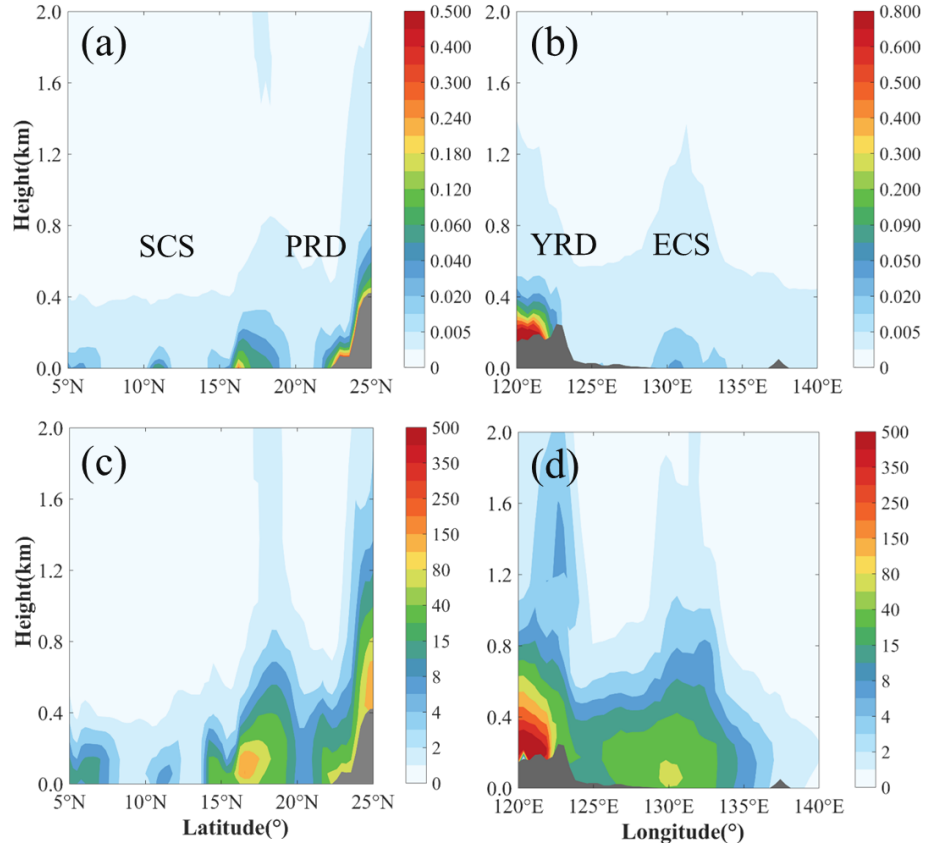

**Figure S4.** Vertical distribution of averaged (a)(b) HONO (Unit: ppbv) and (c)(d) nighttime CINO<sub>2</sub> (Unit: pptv) at cross-section by 113°E and 31°N, respectively in July 2018 from the BASE case. Arrows and the gray shadow present the topography high from the BASE case. We also highlight the South China Sea (SCS) and Pearl River Delta (PRD) in (a) and Yangzi River Delta (YRD) and East China Sea (ECS) in (b).

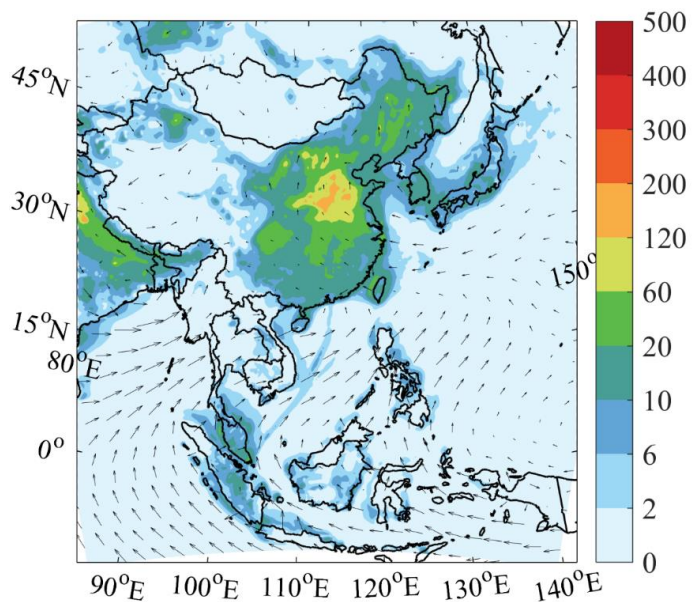

**Figure S5.** Spatial distribution of averaged  $\text{N}_2\text{O}_5$  (Unit: pptv) during nighttime (18:00-06:00 LST) at the surface from the BASE case in July 2018. Arrows present the simulated wind vectors from the BASE case.

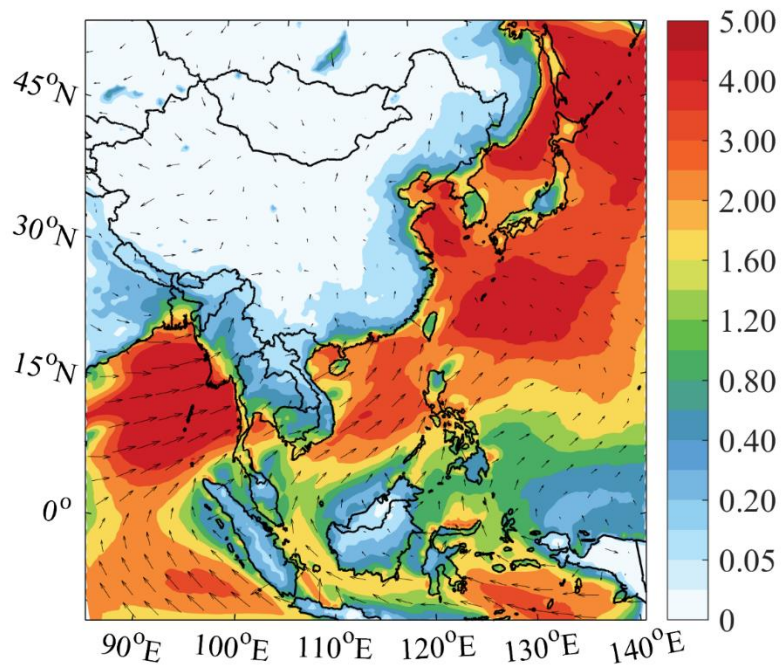

**Figure S6.** Spatial distribution of averaged fine particulate chloride (Unit:  $\mu\text{g m}^{-3}$ ) at the surface from the BASE case in July 2018. Arrows present the simulated wind vectors from the BASE case.

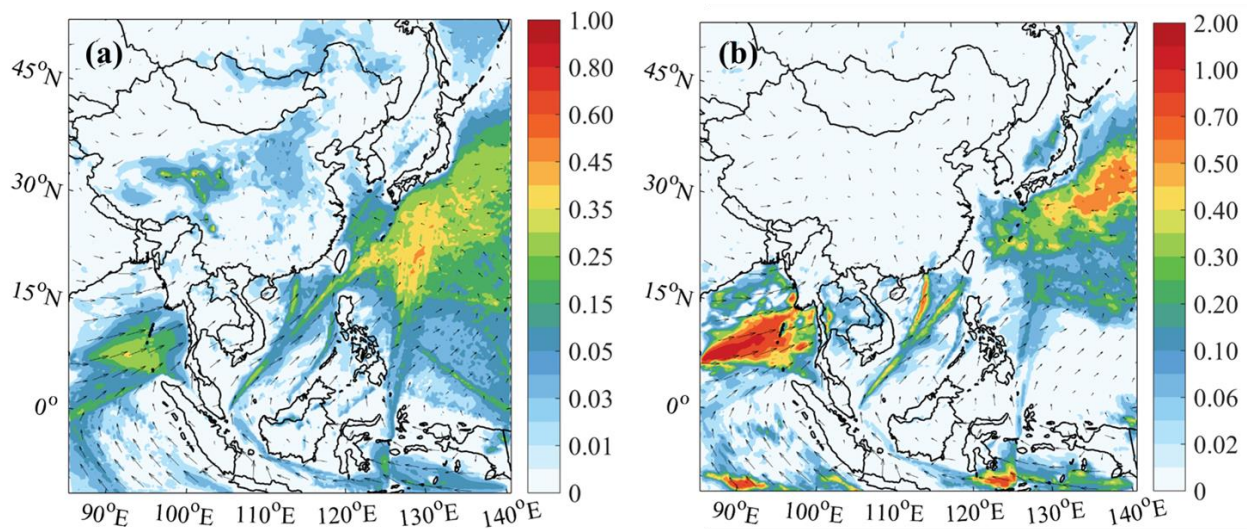

**Figure S7.** Average variation of simulated (a) OH radical (Unit: pptv) during daytime from the ship emission with additional HONO chemistry (HONO - HONO\_noship) and (b) Cl radical (Unit:  $10^{-9}$  pptv) during daytime from the ship emission with chlorine chemistry (Cl - Cl\_noship).

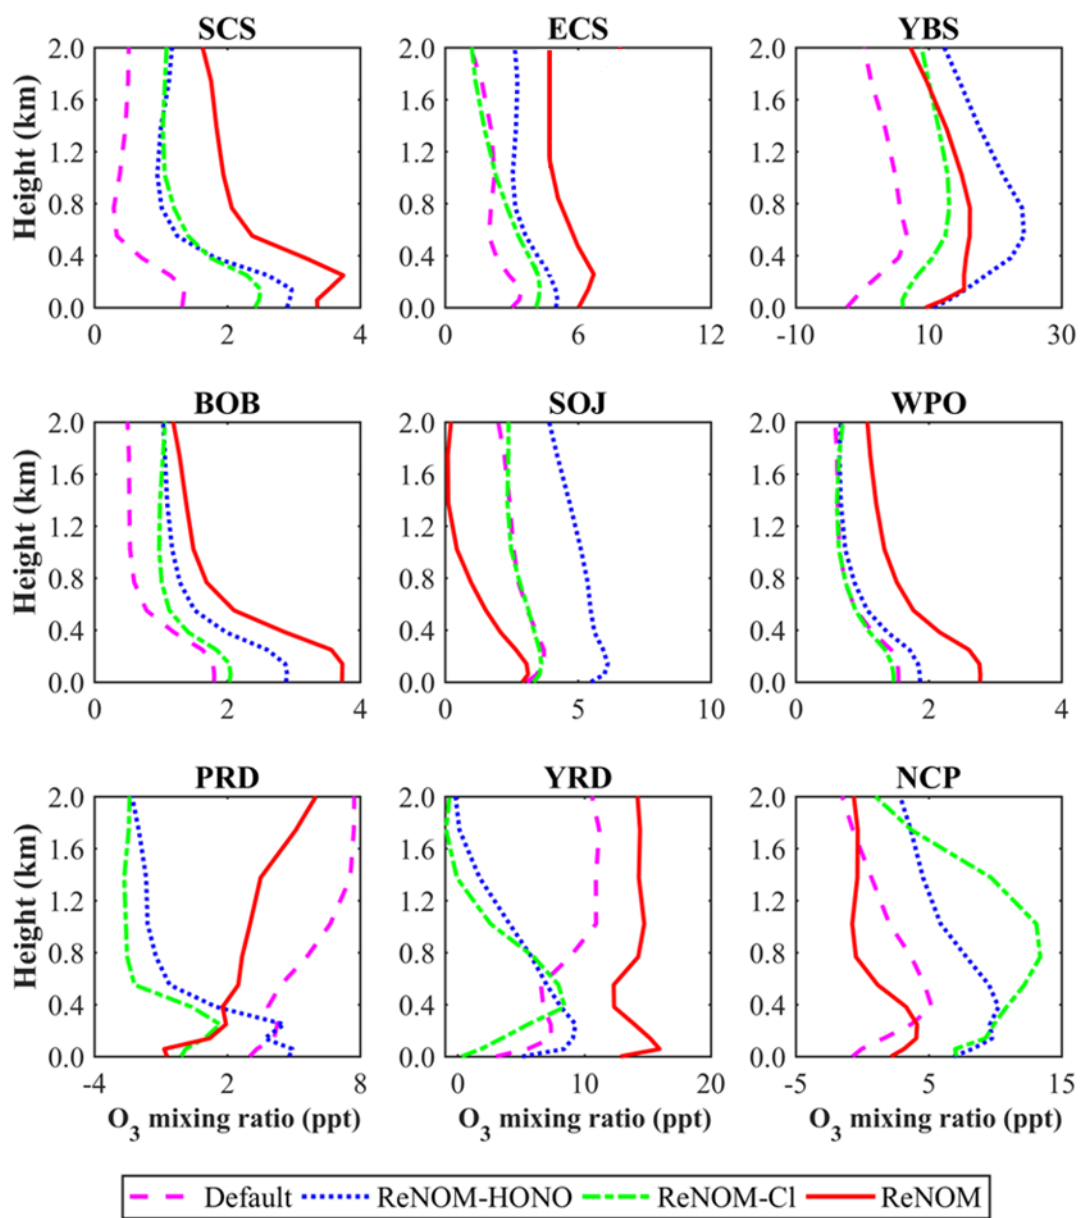

**Figure S8.** Vertical profiles of  $O_3$  variations (Unit: ppbv) from different chemistry in nine regions.

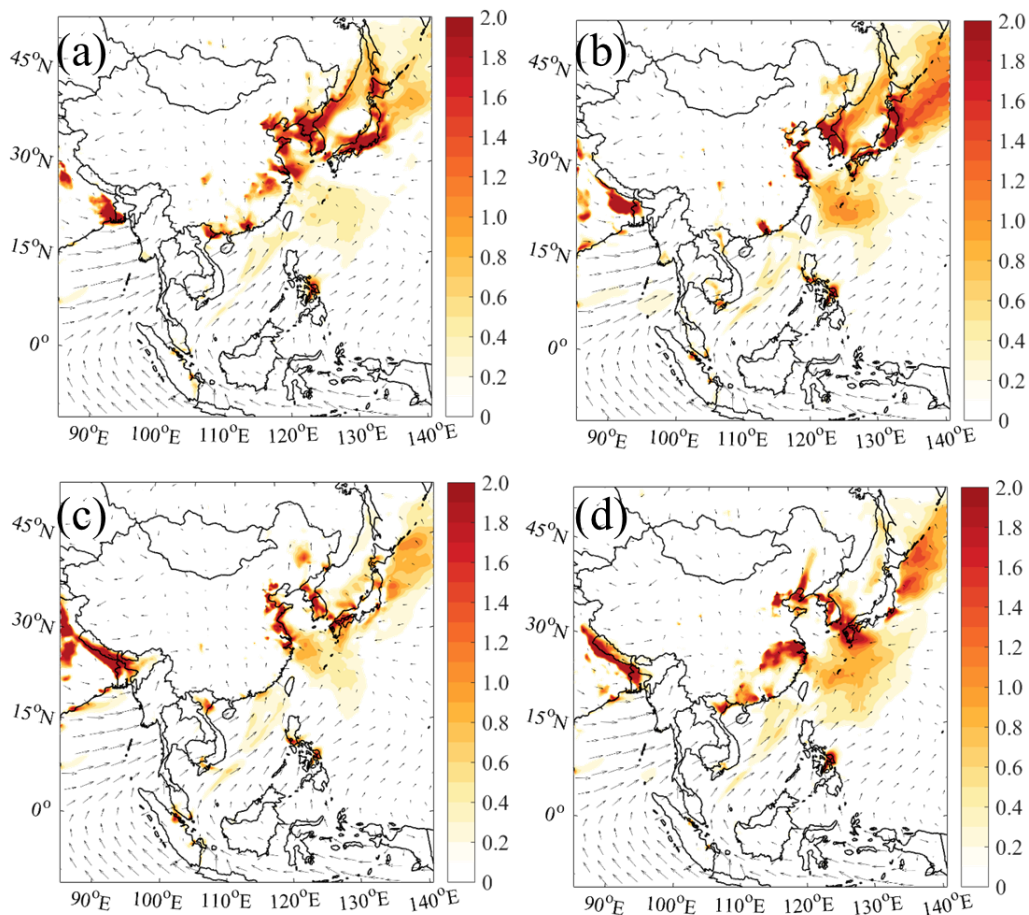

**Figure S9.** Averaged fine particulate nitrate enhancement (Unit:  $\mu\text{g m}^{-3}$ ) with (a) default chemistry (Def-Def\_noship), (b) default and additional HONO chemistry (HONO-HONO\_noship), (c) default and additional chlorine chemistry (Cl-Cl\_noship) and (d) default and integrated HONO and chlorine chemistry (BASE-BASE\_noship). Arrows present the simulated wind vectors from the BASE case.



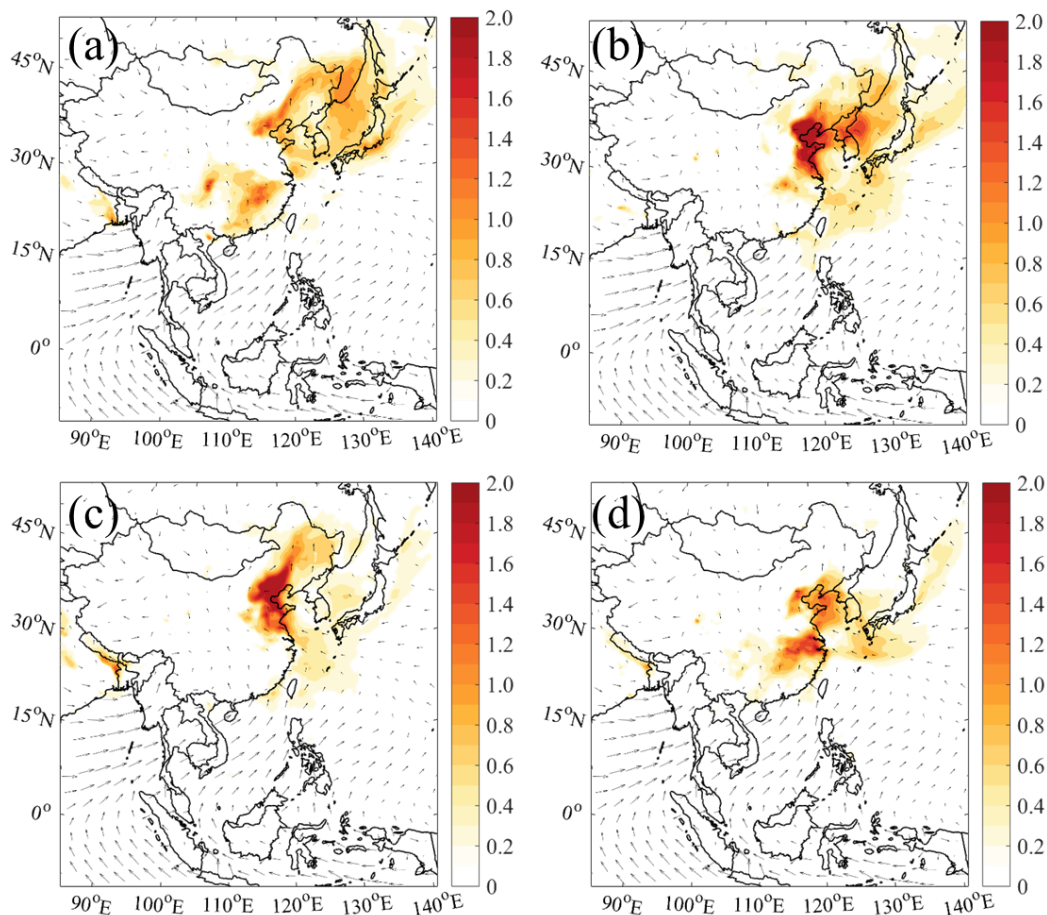

**Figure S10.** Averaged fine particulate sulfur enhancement (Unit:  $\mu\text{g m}^{-3}$ ) with (a) default chemistry (Def-Def\_noship), (b) default and additional HONO chemistry (HONO-HONO\_noship), (c) default and additional chlorine chemistry (Cl-Cl\_noship) and (d) default and integrated HONO and chlorine chemistry (BASE-BASE\_noship). Arrows present the simulated wind vectors from the BASE case.

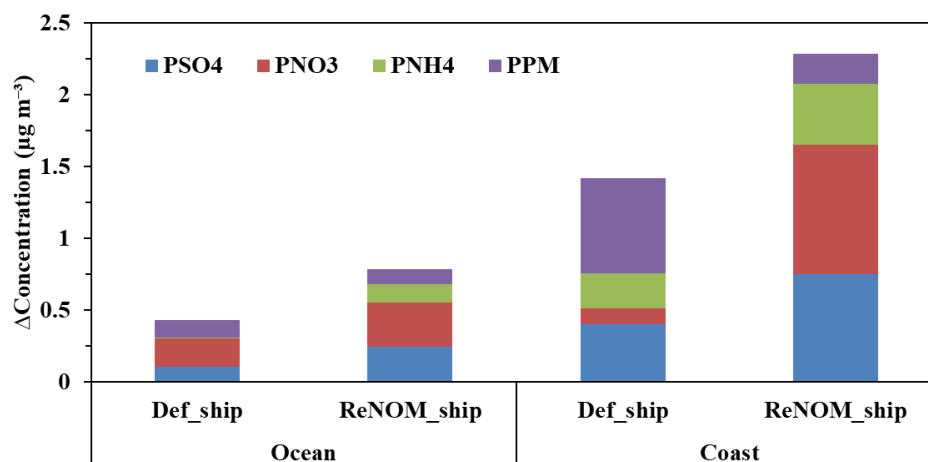

**Figure S11.** Contribution of ship emission to the concentration of detailed aerosol species in oceanic areas and coastal cities. PSO4, PNO3, PNH4 and PPM represent the fine particulate sulfate, fine particulate nitrate, fine particulate ammonia, and primary particulate matter, respectively. Def\_ship and ReNOM\_ship represents Def-Def\_noship and BASE-BASE\_noship, respectively.



## References

- CUI, L., LI, R., FU, H., LI, Q., ZHANG, L., GEORGE, C. & CHEN, J. 2019. Formation features of nitrous acid in the offshore area of the East China Sea. *Science of The Total Environment*, 682, 138-150.
- KASIBHATLA, P., SHERWEN, T., EVANS, M. J., CARPENTER, L. J., REED, C., ALEXANDER, B., CHEN, Q., SULPRIZIO, M. P., LEE, J. D. & READ, K. A. 2018. Global impact of nitrate photolysis in sea-salt aerosol on NO<sub>x</sub>, OH, and O<sub>3</sub> in the marine boundary layer. *Atmospheric Chemistry and Physics*, 11185-11203.
- MEUSEL, H., KUHN, U., REIFFS, A., MALLIK, C., HARDER, H., MARTINEZ, M., SCHULADEN, J., BOHN, B., PARCHATKA, U. & CROWLEY, J. N. 2016. Daytime formation of nitrous acid at a coastal remote site in Cyprus indicating a common ground source of atmospheric HONO and NO. *Atmospheric Chemistry and Physics*, 16, 14475-14493.
- WEN, L., CHEN, T., ZHENG, P., WU, L., WANG, X., MELLOUKI, A., XUE, L. & WANG, W. 2019. Nitrous acid in marine boundary layer over eastern Bohai Sea, China: Characteristics, sources, and implications. *Science of the total environment*, 670, 282-291.
- WOJTAL, P., HALLA, J. & MCLAREN, R. 2011. Pseudo steady states of HONO measured in the nocturnal marine boundary layer: a conceptual model for HONO formation on aqueous surfaces. *Atmospheric Chemistry and Physics*, 11, 3243.
- YE, C., ZHOU, X., PU, D., STUTZ, J., FESTA, J., SPOLAOR, M., TSAI, C., CANTRELL, C., MAULDIN, R. L. & CAMPOS, T. 2016. Rapid cycling of reactive nitrogen in the marine boundary layer. *Nature*, 532, 489-491.
